# Supplementary material for: Image-Guided Liver Stereotactic Body Radiotherapy Using VMAT and Real-Time Adaptive Tumor Gating: Evaluation of the Efficacy and Toxicity for Hepatocellular Carcinoma
Source: MDPI journal article supplement (doi:10.3390/cancers13194853), 2021-09-28
Supplement: s1 [file s1]

**Table S1.** Prospective studies [34,36–47,35,48–50] evaluating SBRT for HCC: LC, local control; OS, overall survival; PFS, progression free survival; gastro intestinal toxicities = gastric ulcer, duodenal ulcer ; liver toxicities = hepatic pains, ascites, decompensation of cirrhosis, disturbed liver function, RILD and non classic RILD.

| Studies                                                | Number of Patients | Median Size of Lesion (mm) | Average Volume Treated (cm3) GTV/PTV | Total Dose (Gy) | Nb of Fraction | Median Follow up (Months) | Local Control 1 yr/2 yrs (%) | OS 1 yr/2 yrs (%) | PFS 1 yr/2 yrs (%) | Gastrointestinal Toxicities (Grade > 2) | Liver Toxicity (Grade > 2)       |
|--------------------------------------------------------|--------------------|----------------------------|--------------------------------------|-----------------|----------------|---------------------------|------------------------------|-------------------|--------------------|-----------------------------------------|----------------------------------|
| <b>Tse et al., 2007 Canada [18]</b>                    | 31                 | -                          | 173/-                                | 24–54           | 6              | 17.6                      | 65/-                         | 48/-              | -                  | G5 = 3%<br>G4 = 6.5%                    | G3 = 25.8%                       |
| <b>Mendez-Romero et al., 2009 The Netherlands [19]</b> | 8                  | 32                         | 22/-                                 | 25–37.5         | 3–5            | 12.9                      | 94 /82                       | -                 | -                  | -                                       | G3 = 37.5%<br>G5 = 12.5%         |
| <b>Cardenes et al., 2010, Mexico [20]</b>              | 17                 | 40                         | 34/-                                 | 36–48           | 3              | 24                        | 100/100                      | 75/60             | -                  | -                                       | RILD = 17.6%                     |
| <b>Kang et al., 2012 Korea [21]</b>                    | 47                 | 29                         | -                                    | 42–60           | 3              | 17                        | -/94.6                       | -/68.7            | -/33.8             | G4 = 4,3%                               | G3 bio = 15%<br>G3 clinical = 4% |
| <b>Bujold et al., 2013 Canada [22]</b>                 | 102                | 72                         | 117/283.5                            | 24–54           | 6              | 31                        | 87.2/-                       | 55/-              | -                  | G3 = 2%<br>G5 = 1%                      | G3 = 1% G4 = 1% G5 = 6%          |
| <b>Scorsetti et al., 2015 Italy [23]</b>               | 43                 | 48                         | -/169.7                              | 36–75           | 3–6            | 8                         | 85.8/64.4                    | 77.9/45.3         | 41/-               | -                                       | G3 = 16%                         |
| <b>Kim et al., 2016 Korea [24]</b>                     | 18                 | 20.5                       | -/79.9                               | 36–60           | 4              | 23                        | 77.8/71.3                    | 94.4/69.3         | 55.6/49.4          | -                                       | -                                |

**Table S2.** Retrospective studies evaluating SBRT for HCC: OS = overall survival, PFS = progression free survival, gastro intestinal toxicities = gastric ulcer, duodenal ulcer; liver toxicities = hepatic pains, ascites, decompensation of cirrhosis, disturbed liver function, RILD and non classic RILD.

| Retrospective Studies              | Number of Patients | Median Lesion Size (mm) | Average Volume Treated (cm <sup>3</sup> ) GTV/PTV | Total Dose (Gy) | Number of Fractions | Median Follow-up (Months) | LC 1 Year/2 Years (%) | OS 1 Year/2 Years (%) | PFS 1 Year/2 Years (%) | Gastrointestinal Toxicity (Grade > 2) | Liver Toxicity (Grade > 2)      |
|------------------------------------|--------------------|-------------------------|---------------------------------------------------|-----------------|---------------------|---------------------------|-----------------------|-----------------------|------------------------|---------------------------------------|---------------------------------|
| <i>Blomgren et al. 1995-Sweden</i> | 8                  | -                       | 110/-                                             | 30              | 2–3                 | 12                        | 100–95%               | -                     | -                      | -                                     | G5 = 37.5%                      |
| <i>Choi et al. 2008-Korea</i>      | 31                 | -                       | 25.2/-                                            | 30–39           | 3                   | 10.5                      | 71.9/-                | 81.4/-                | -                      | -                                     | RILD = 6.5%                     |
| <i>Seo et al. 2010-Korea</i>       | 38                 | -                       | 40.5/-                                            | 33–57           | 3–4                 | 15                        | 78.5/66.4             | 68.4/61.4             | 46.4/37.5              | -                                     | -                               |
| <i>Kwon et al. 2010-Korea</i>      | 42                 | -                       | 77/-                                              | 30–39           | 3                   | 28.7                      | 59.6/-                | 92.9/-                | 72/-                   | -                                     | G4 = 1%<br>RILD = 2%            |
| <i>Andolino et al. 2011-USA</i>    | 60                 | 31                      | -                                                 | 24–48           | 3–5                 | 27                        | -/90                  | -/67                  | -/48                   | -                                     | RILD = 6.7%<br>G5 = 3.3%        |
| <i>Dewas et al. 2012-France</i>    | 42                 | 40                      | 57.5/138.2                                        | 27–45           | 3                   | 15                        | 89/89                 | 72/42.4               | 56/38                  | G3 = 12%                              | RILD = 7.1%                     |
| <i>Bibault et al. 2013-France</i>  | 75                 | 37                      | 130.7/-                                           | 45              | 3                   | 10                        | 89.8/89.8             | 78.5/50.4             | -                      | G4 = 1.3%                             | NC RILD = 6.6%                  |
| <i>Yoon et al. 2013-Korea</i>      | 93                 | 20                      | 8.6/40.8                                          | 30–60           | 3–4                 | 25.7                      | 94.8/92.1             | 86/53.8               | 87.9/72.2              | -                                     | G5 = 1%                         |
| <i>Jang et al. 2013-Korea</i>      | 82                 | 30                      | -                                                 | 33–60           | 3                   | 30                        | -/87                  | -/63                  | -                      | G3–4 = 6%                             | NC RILD = 7%                    |
| <i>Sanuki et al. 2014-Japan</i>    | 48<br>132          | 27<br>24                | 8.9/40.4<br>7.2/37.1                              | 35<br>40        | 5<br>5              | 31<br>23                  | 97.5/90.7<br>100/94.2 | 95/83<br>95.7/82.5    | 97/97<br>95.9/90.1     | -                                     | G5 = 1%<br>RILD = 9.4%          |
| <i>Lo et al. 2014-Taiwan</i>       | 53                 | 43                      | -                                                 | 40              | 4–5                 | 13                        | 73.3/66.8             | 70.1/45.4             | -                      | G 3–4 = 5.5%                          | RILD = 1.8%                     |
| <i>Takeda et al. 2014-Japan</i>    | 63                 | 26                      | -                                                 | 35–40           | 5                   | 31                        | 100/95                | 100/87                | -                      | -                                     | 16%                             |
| <i>Huertas et al. 2015-France</i>  | 77                 | 24                      | 11.7/-                                            | 45              | 3                   | 12                        | 99/99                 | 81.8/56.6             | 69.3/44.4              | G3 = 1.3% G4 = 1.3% G5 = 1.3%         | G3 = 3.9%                       |
| <i>Baumann et al. 2018-USA</i>     | 37                 | 27                      | -                                                 | 50              | 5                   | 14                        | 95/-                  | 87/-                  | 66/-                   | G3 = 2.7%                             | G3 = 8%                         |
| <i>Zhang et al. 2018-China</i>     | 28                 | 21                      | -                                                 | 35–60           | 3–6                 | 36                        | 96.4–92.9             | 92.9/85.7             | -                      | -                                     | G4bio = 3.5%<br>Acute = 22.6%   |
| <i>Yeung et al. 2018-China</i>     | 31                 | 33                      | -                                                 | 45              | 3–5                 | 18.3                      | 84/-                  | 84/-                  | 49                     | Acute = 3.2%<br>Delayed = 0%          | Delayed = 6.4%<br>NC RILD = 19% |
| <i>Scher et al. 2019-France</i>    | 136                | 22                      | -/41.3                                            | 45              | 3                   | 13                        | 94.5–91%              | 79.8–63.5%            | 61.3–39.4%             | Acute = 3%<br>Delayed = 2%            | RILD = 14%                      |
